# Supplementary material for: Bayesian Decision Analysis: An Underutilized Tool in Veterinary Medicine
Source: Animals (Basel). 2022 Dec 4;12(23):3414. doi: 10.3390/ani12233414 (PMC9738643; doi:10.3390/ani12233414)
Supplement: Supplementary file 1 [file animals-12-03414-s001.zip › animals-2003530-supplementary-Table S4.xlsx]

## Sheet: Sheet1
Differential Diagnoses (Must Be Mutually Exclusive and Exhaustive)	Prior Probability (PrP)	Conditional Probability (CP) of Diagnostic 1	CP of Diagnostic 2	CP of Diagnostic 3	CP of Diagnostic 4	CP of Diagnostic 5	CP of Diagnostic 6	PrP*CPs	Posterior Probability (%)
Diagnosis 1								0	#DIV/0!
Diagnosis 2								0	#DIV/0!
Diagnosis 3								0	#DIV/0!
Diagnosis 4								0	#DIV/0!
Diagnosis 5								0	#DIV/0!
Diagnosis 6								0	#DIV/0!
Diagnosis 7								0	#DIV/0!
SUM								0
